# Supplementary material for: 3D-QSAR studies on Maslinic acid analogs for Anticancer activity against Breast Cancer cell line MCF-7
Source: PubMed Central journal article supplement (PMC5519539; doi:10.1038/s41598-017-06131-0), 2017-07-20
Supplement: 41598_2017_6131_MOESM1_ESM.pdf [file 41598_2017_6131_MOESM1_ESM.pdf]

## 3D-QSAR studies on Maslinic acid analogs for Anticancer activity against Breast Cancer cell line MCF-7

Sarfaraz Alam<sup>1, 2,\*,#</sup> and Feroz Khan<sup>1, 2,\*,#</sup>

<sup>1</sup>Metabolic & Structural Biology Dept., CSIR-Central Institute of Medicinal & Aromatic Plants, P.O.-CIMAP, Lucknow-226015 (U.P.), INDIA

<sup>2</sup>Academy of Scientific & Innovative Research (AcSIR), CSIR-CIMAP Campus, Lucknow-226015 (U.P.), INDIA

\*Correspondence to be addressed:

Metabolic & Structural Biology Department, CSIR-Central Institute of Medicinal & Aromatic Plants, P.O.-CIMAP, Kukrail Picnic Spot Road, Lucknow-226015 (Uttar Pradesh), India; Tel.: +91 522 271 7668, Fax: +91 522 234 2666; E-mail: [f.khan@cimap.res.in](mailto:f.khan@cimap.res.in); CIMAP Communication No.: CIMAP/PUB/2016/85.

#Present Address: Skaggs School of Pharmacy & Pharmaceutical Sciences, University of California San Diego (UCSD), 9500 Gilman Drive, La Jolla, San Diego, CA 92093, USA

**Table S1.** Details of the training set compounds with experimental and predicted anticancer activities.

| Serial No. | Compound | Structure                                                                           | Experimental activity (pIC <sub>50</sub> )* | Predicted Activity (pIC <sub>50</sub> )* | Error factor** |
|------------|----------|-------------------------------------------------------------------------------------|---------------------------------------------|------------------------------------------|----------------|
| 1          | T-254    | 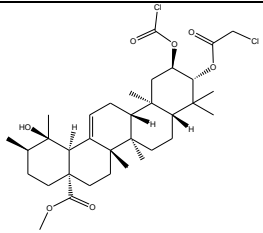  | 5.82                                        | 5.5                                      | -0.32          |
| 2          | T-971    |  | 4.88                                        | 4.9                                      | 0.02           |
| 3          | T-623    |  | 4.9                                         | 4.9                                      | 0              |

|   |       |                                                                                     |      |     |       |
|---|-------|-------------------------------------------------------------------------------------|------|-----|-------|
| 4 | T-159 | 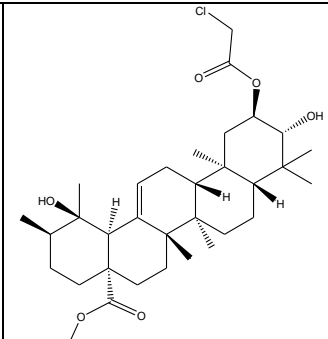   | 5.59 | 5.3 | -0.29 |
| 5 | T-418 |    | 5.11 | 4.9 | -0.21 |
| 6 | T-013 |    | 5.82 | 5.8 | -0.02 |
| 7 | T-689 |   | 6.3  | 6.4 | 0.1   |
| 8 | T-726 |  | 4.71 | 4.6 | -0.11 |
| 9 | T-598 |  | 4.59 | 4.6 | 0.01  |

|    |       |                                                                                     |      |     |       |
|----|-------|-------------------------------------------------------------------------------------|------|-----|-------|
| 10 | T-585 | 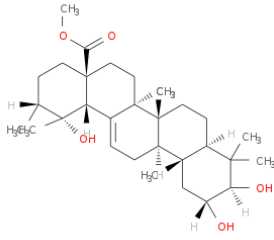   | 4.5  | 4.8 | 0.3   |
| 11 | T-494 |    | 4.45 | 4.7 | 0.25  |
| 12 | T-756 |    | 4.75 | 4.9 | 0.15  |
| 13 | T-816 |  | 4.86 | 4.9 | 0.04  |
| 14 | T-250 |  | 4.82 | 4.8 | -0.02 |
| 15 | T-066 |  | 4.84 | 5   | 0.16  |

|    |       |                                                                                     |      |     |       |
|----|-------|-------------------------------------------------------------------------------------|------|-----|-------|
| 16 | T-863 | 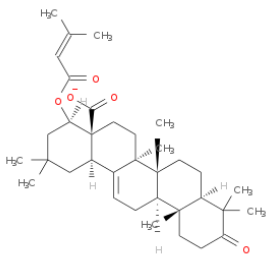   | 4.36 | 4.7 | 0.34  |
| 17 | T-542 |    | 4.8  | 4.6 | -0.2  |
| 18 | T-676 |    | 4.59 | 4.7 | 0.11  |
| 19 | T-770 |  | 4.67 | 4.6 | -0.07 |
| 20 | T-361 |  | 4.54 | 4.5 | -0.04 |
| 21 | T-135 |  | 4.65 | 4.6 | -0.05 |

|    |       |                                                                                     |      |     |       |
|----|-------|-------------------------------------------------------------------------------------|------|-----|-------|
| 22 | T-158 | 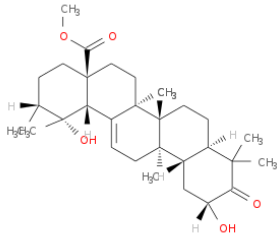   | 5.03 | 4.8 | -0.23 |
| 23 | T-692 |    | 4.33 | 4.4 | 0.07  |
| 24 | T-815 |   | 4.87 | 4.8 | -0.07 |
| 25 | T-219 |  | 4.79 | 4.8 | 0.01  |
| 26 | T-583 |  | 4.65 | 4.8 | 0.15  |

|    |       |                                                                                     |      |     |       |
|----|-------|-------------------------------------------------------------------------------------|------|-----|-------|
| 27 | T-831 | 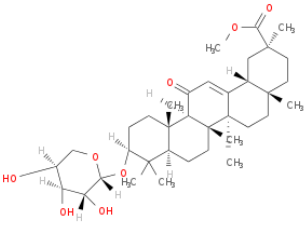   | 4.78 | 4.8 | 0.02  |
| 28 | T-327 |    | 4.79 | 4.8 | 0.01  |
| 29 | T-078 |   | 5.09 | 4.9 | -0.19 |
| 30 | T-862 |  | 6.22 | 6.3 | 0.08  |
| 31 | T-624 |  | 4.89 | 4.8 | -0.09 |

|    |       |                                                                                     |      |     |       |
|----|-------|-------------------------------------------------------------------------------------|------|-----|-------|
| 32 | T-945 | 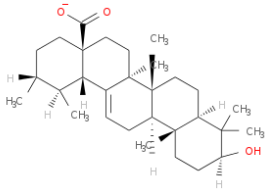   | 4.91 | 4.7 | -0.21 |
| 33 | T-131 |    | 4.6  | 4.7 | 0.1   |
| 34 | T-362 |   | 5.16 | 5.3 | 0.14  |
| 35 | T-534 |  | 4.71 | 4.8 | 0.09  |
| 36 | T-584 |  | 4.75 | 4.8 | 0.05  |

|    |       |                                                                                     |      |     |       |
|----|-------|-------------------------------------------------------------------------------------|------|-----|-------|
| 37 | T-715 | 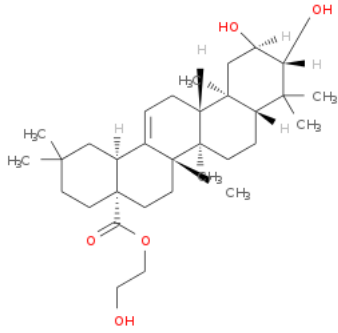   | 4.62 | 4.7 | 0.08  |
| 38 | T-264 |    | 5.34 | 5.5 | 0.16  |
| 39 | T-417 |  | 4.68 | 4.8 | 0.12  |
| 40 | T-134 |  | 4.95 | 4.7 | -0.25 |



|    |       |                                                                                     |      |     |       |
|----|-------|-------------------------------------------------------------------------------------|------|-----|-------|
| 41 | T-220 | 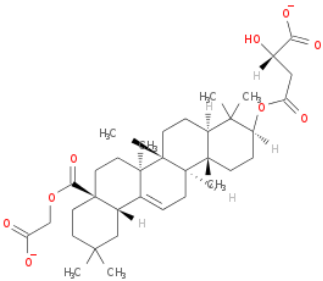   | 4.45 | 4.5 | 0.05  |
| 42 | T-015 |    | 4.37 | 4.4 | 0.03  |
| 43 | T-535 |   | 5.07 | 4.9 | -0.17 |
| 44 | T-265 |  | 6.22 | 6.2 | -0.02 |

|    |       |                                                                                     |      |     |       |
|----|-------|-------------------------------------------------------------------------------------|------|-----|-------|
| 45 | T-193 | 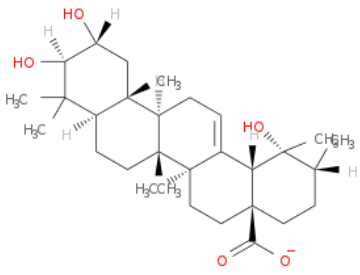   | 4.49 | 4.6 | 0.11  |
| 46 | T-286 |    | 5.41 | 5.4 | -0.01 |
| 47 | T-257 |  | 5.03 | 5   | -0.03 |

**Footnote:** \*Measured and predicted value in  $pIC_{50}$ ; \*\*the difference between predicted and experimental activity values represented as error factor, with a negative sign, if the actual activity higher than predicted activity.

**Abbreviations:**  $pIC_{50}$ , negative of the log inhibitory concentration to 50% of the population.

**Table S2.** Details of the test set compounds with experimental and predicted anticancer activities.

| Serial No. | Compound | Experimental activity ( $pIC_{50}$ )* | Predicted activity ( $pIC_{50}$ )* | Error factor** |
|------------|----------|---------------------------------------|------------------------------------|----------------|
|------------|----------|---------------------------------------|------------------------------------|----------------|

|   |       |                                                                                     |      |     |       |
|---|-------|-------------------------------------------------------------------------------------|------|-----|-------|
| 1 | T-804 | 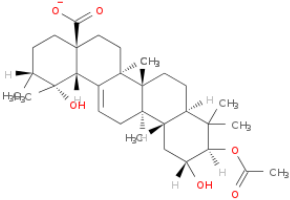   | 4.58 | 4.9 | 0.32  |
| 2 | T-622 |    | 4.44 | 4.9 | 0.46  |
| 3 | T-728 |   | 4.7  | 5   | 0.3   |
| 4 | T-922 |  | 4.83 | 5.3 | 0.47  |
| 5 | T-970 |  | 5.06 | 4.9 | -0.16 |

|    |       |                                                                                     |      |     |       |
|----|-------|-------------------------------------------------------------------------------------|------|-----|-------|
| 6  | T-861 | 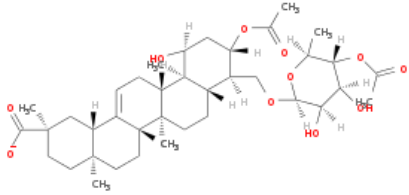   | 5.6  | 5.7 | 0.1   |
| 7  | T-501 |    | 4.73 | 4.6 | -0.13 |
| 8  | T-972 |   | 4.63 | 4.8 | 0.17  |
| 9  | T-015 |  | 4.41 | 5.2 | 0.79  |
| 10 | T-543 |  | 5.44 | 4.5 | -0.94 |

|    |       |                                                                                     |      |     |       |
|----|-------|-------------------------------------------------------------------------------------|------|-----|-------|
| 11 | T-285 | 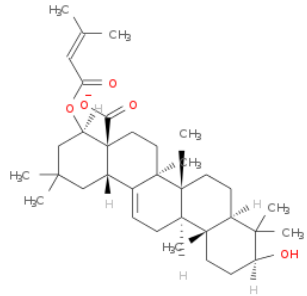   | 5.28 | 4.7 | -0.58 |
| 12 | T-132 |    | 4.61 | 5.4 | 0.79  |
| 13 | T-133 |   | 5.04 | 5.6 | 0.56  |
| 14 | T-014 |  | 4.98 | 6.2 | 1.22  |

|    |        |                                                                                     |      |     |       |
|----|--------|-------------------------------------------------------------------------------------|------|-----|-------|
| 15 | T-8131 | 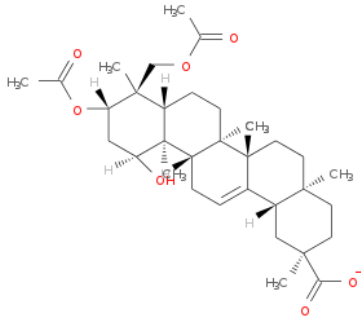   | 5.22 | 5.6 | 0.38  |
| 16 | T-727  |    | 5.02 | 4.6 | -0.42 |
| 17 | T-760  |   | 4.69 | 5.1 | 0.41  |
| 18 | T-977  |  | 4.79 | 4.6 | -0.19 |
| 19 | T-803  |  | 4.6  | 4.9 | 0.3   |

|    |       |                                                                                     |      |     |       |
|----|-------|-------------------------------------------------------------------------------------|------|-----|-------|
| 20 | T-971 | 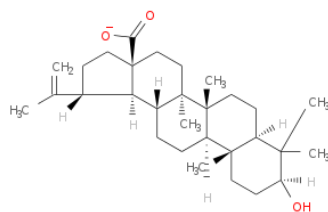   | 4.91 | 4.6 | -0.31 |
| 21 | T-673 |    | 4.89 | 4.8 | -0.09 |
| 22 | T-617 |   | 5.09 | 4.8 | -0.29 |
| 23 | T-859 |  | 4.78 | 5.3 | 0.52  |
| 24 | T-516 |  | 4.65 | 4.9 | 0.25  |

|    |       |                                                                                    |      |     |       |
|----|-------|------------------------------------------------------------------------------------|------|-----|-------|
| 25 | T-049 | 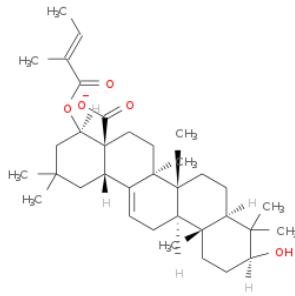  | 5.22 | 4.8 | -0.42 |
| 26 | T-533 |   | 4.87 | 4.8 | -0.07 |
| 27 | T-695 |  | 4.33 | 5.3 | 0.97  |

**Footnote:** \*Measured and predicted value in  $pIC_{50}$ ; \*\*the difference between predicted and experimental activity values represented as error factor, with a negative sign, if the actual activity higher than predicted activity.  
**Abbreviations:**  $pIC_{50}$ , negative of the log inhibitory concentration to 50% of the population.

**Table S3.** Details of predicted set compounds with predicted anticancer activity, distance to model estimation, ADMET score and predicted ADMET risk parameters.

| Serial No. | Compound name | Predicted activity ( $pIC_{50}$ ) | Distance to model | ADMET score | ADMET risk parameters    |
|------------|---------------|-----------------------------------|-------------------|-------------|--------------------------|
| 1.         | P-645         | 4.6                               | Good              | 2.76        | Size,ch,Kow,Sw,rat,3A4   |
| 2.         | P-332         | 4.7                               | OK                | 3.96        | Size,ch,Kow,Peff,rat     |
| 3.         | P-630         | 4.9                               | Good              | 3.96        | Size,ch,Kow,rat,3A4      |
| 4.         | P-264         | 4.6                               | Good              | 3.97        | Size,ch,Kow,Peff,rat     |
| 5.         | P-175         | 4.3                               | Excellent         | 3.99        | Size,ch,Kow,Peff,rat,3A4 |
| 6.         | P-855         | 4.5                               | OK                | 4.12        | Size,ch,Kow,Sw,rat,3A4   |
| 7.         | P-031         | 4.2                               | OK                | 4.22        | Size,ch,Kow,Sw,rat,3A4   |
| 8.         | P-902         | 5.2                               | OK                | 4.22        | Size,ch,Kow,Sw,rat       |



|     |        |     |           |      |                                  |
|-----|--------|-----|-----------|------|----------------------------------|
| 9.  | P-701  | 5.2 | OK        | 4.28 | Size,ch,Kow,Peff,rat,2C9,3A4     |
| 10. | P-312  | 5   | OK        | 4.41 | Size,ch,Kow,Peff,rat             |
| 11. | P-252  | 4.7 | OK        | 4.44 | Size,ch,Kow,Peff,rat             |
| 12. | P-359  | 4.8 | OK        | 4.45 | Size,ch,Kow,Sw,rat,3A4           |
| 13. | P-557  | 4.6 | OK        | 4.49 | Size,ch,Kow,Sw,rat,3A4           |
| 14. | P-724  | 4.8 | OK        | 4.51 | Size,HD,ch,Peff,rat,Hp           |
| 15. | P-959  | 4.6 | Good      | 4.54 | Size,ch,Kow,Peff,rat,3A4         |
| 16. | P-192  | 4.7 | OK        | 4.62 | Size,ch,Kow,Sw,rat,3A4           |
| 17. | P-508  | 4.9 | Excellent | 4.87 | Size,ch,Kow,Sw,rat,2C9,3A4       |
| 18. | P-921  | 4.8 | OK        | 4.94 | Size,ch,Kow,Sw,rat,3A4           |
| 19. | P-825  | 4.8 | Excellent | 4.96 | Size,ch,Kow,Peff,rat             |
| 20. | P-240  | 4.8 | Good      | 5.00 | Size,ch,Peff,rat,Hp              |
| 21. | P-306  | 5.2 | Good      | 5.15 | Size,ch,Kow,Sw,rat,2C9,3A4       |
| 22. | P-464  | 5   | Good      | 5.17 | Size,ch,Kow,Sw,fu,rat,3A4        |
| 23. | P-984  | 4.9 | Good      | 5.17 | Size,ch,Kow,Sw,rat,2C9,3A4       |
| 24. | P-211  | 4.5 | Excellent | 5.20 | Size,ch,Kow,Sw,rat,2C9,3A4       |
| 25. | P-673  | 4.7 | OK        | 5.20 | Size,ch,Kow,Peff,rat,mi          |
| 26. | P-314  | 4.9 | Good      | 5.22 | Size,ch,Kow,Sw,rat,3A4           |
| 27. | P-654  | 5   | Good      | 5.28 | Size,ch,Kow,Peff,rat,Hp          |
| 28. | P-708  | 4.8 | OK        | 5.30 | Size,ch,Kow,Peff,rat,3A4,mi      |
| 29. | P-526  | 4.8 | Good      | 5.50 | Size,ch,Kow,Sw,rat,Hp,3A4        |
| 30. | P-422  | 4.9 | OK        | 5.52 | Size,ch,Kow,Sw,rat,2C9,3A4       |
| 31. | P-3845 | 4.8 | OK        | 5.73 | Size,ch,Kow,Sw,fu,rat,3A4        |
| 32. | P-027  | 4.4 | OK        | 5.73 | Size,HD,ch,Peff,rat,Hp           |
| 33. | P-227  | 4.6 | OK        | 5.90 | Size,ch,Kow,Sw,rat,Hp,3A4        |
| 34. | P-579  | 4.5 | Excellent | 5.99 | Size,HD,ch,Peff,rat,Hp           |
| 35. | P-878  | 4.9 | Good      | 6.00 | Size,HD,ch,Peff,rat,Hp           |
| 36. | P-668  | 4.7 | OK        | 6.33 | Size,ch,Kow,Sw,fu,rat,2C9,3A4    |
| 37. | P-932  | 5   | Good      | 6.49 | Size,ch,Kow,Peff,Sw,rat,Hp,mi    |
| 38. | P-943  | 4.7 | OK        | 6.49 | Size,ch,Kow,Sw,fu,rat,3A4        |
| 39. | P-200  | 4.8 | OK        | 6.73 | Size,ch,Kow,Sw,fu,rat,3A4        |
| 40. | P-454  | 4.9 | OK        | 6.97 | Size,ch,Kow,Sw,fu,rat,2C9,3A4,CL |
| 41. | P-937  | 4.8 | Good      | 7.16 | Size,ch,Kow,Sw,fu,rat,2C9,3A4,CL |

**Table S4:** Comparative evaluation of calculated bio-physicochemical properties of compound P-902 (maslinic acid analog) and anticancer drug topotecan (control).

| Properties   | Compound P-902 | Topotecan  |
|--------------|----------------|------------|
| S+Acidic_pKa | 5.22           | 9.73       |
| S+Mixed_pKa  | None           | None       |
| S+Basic_pKa  | None           | 7.57; 2.49 |
| DiffCoef     | 0.539          | 0.65       |
| MlogP        | 4.753          | 1.6        |

|               |                |           |
|---------------|----------------|-----------|
| S+logP        | 5.858          | 1.9       |
| S+logD        | 3.695          | 1.51      |
| S+logHLC      | -8.735         | -12.51    |
| S+Peff        | 3.686          | 0.97      |
| S+MDCK        | 50.684         | 190.26    |
| S+Pcornea     | 224.475        | 78.05     |
| S+Pskin       | 113.623        | 1.9       |
| S+Sw          | 0.008          | 4.27E-01  |
| S+pH_Satd     | 5.118          | 8.64      |
| S+S_Intrins   | 0.005          | 3.66E-01  |
| S+SF          | 1932.962       | 1.41E+02  |
| S+S_pH        | 0.693          | 9.06E-01  |
| S+FaSSGF      | 4.015E-4       | 1.73E+00  |
| S+FaSSIF      | 0.079          | 2.34E-01  |
| S+FeSSIF      | 0.201          | 3.83E-01  |
| S+SSR         | SupSat         | SupSat    |
| S+BBB_Filter  | Low            | Low       |
| S+LogBB       | -0.649         | -0.43     |
| S+PrUnbnd     | 1.657          | 17.45     |
| S+Vd          | 0.477          | 1.85      |
| S+RBP         | 0.565          | 1.04      |
| S+fumic       | 0.264          | 0.735     |
| S+Pgp_Substr  | No (75%)       | Yes (65%) |
| S+Pgp_Inh     | No (60%)       | No (94%)  |
| S+OATP1B1_Inh | Yes (80%)      | No (97%)  |
| S+HIVI-ST     | 5.050          | 4.34      |
| S+HIVI-TC     | 4.864          | 4.3       |
| S+Absn_Risk   | 3.26           | 0         |
| S+Absn_Code   | Size,ch,Kow,Sw |           |
| RuleOf5       | 1              | 0         |
| RuleOf5_Code  | LP             |           |

**Table S5.** Comparative evaluation of metabolism parameters for compound P-902 (maslinic acid analog) and anticancer drug topotecan (control).

| <b>Properties</b> | <b>Compound P-902</b>        | <b>Topotecan</b> |
|-------------------|------------------------------|------------------|
| MET_1A2_Inh       | No (97%)                     | No               |
| CYP_1A2_Substr    | Yes (78%)                    | No               |
| CYP_1A2_Sites     | NonSubstrate                 | NonSubstrate     |
| MET_1A2_Km        | NonSubstrate                 | NonSubstrate     |
| MET_1A2_Vmax      | NonSubstrate                 | NonSubstrate     |
| MET_1A2_CLint     | NonSubstrate                 | NonSubstrate     |
| CYP_2A6_Substr    | No                           | No               |
| CYP_2A6_Sites     | NonSubstrate                 | NonSubstrate     |
| CYP_2B6_Substr    | No                           | No               |
| CYP_2B6_Sites     | NonSubstrate                 | NonSubstrate     |
| CYP_2C8_Substr    | Yes (58%)                    | No               |
| CYP_2C8_Sites     | C33(897); C20(869); C1(642); | NonSubstrate     |
| MET_2C9_Inh       | Yes (58%)                    | No               |
| CYP_2C9_Substr    | No                           | No               |
| CYP_2C9_Sites     | NonSubstrate                 | NonSubstrate     |
| MET_2C9_Km        | NonSubstrate                 | NonSubstrate     |
| MET_2C9_Vmax      | NonSubstrate                 | NonSubstrate     |

|                     |                                                   |                                           |
|---------------------|---------------------------------------------------|-------------------------------------------|
| MET_2C9_CLint       | NonSubstrate                                      | NonSubstrate                              |
| MET_2C19_Inh        | No                                                | No                                        |
| CYP_2C19_Substr     | No                                                | No                                        |
| CYP_2C19_Sites      | NonSubstrate                                      | NonSubstrate                              |
| MET_2C19_Km         | NonSubstrate                                      | NonSubstrate                              |
| MET_2C19_Vmax       | NonSubstrate                                      | NonSubstrate                              |
| MET_2C19_CLint      | NonSubstrate                                      | NonSubstrate                              |
| MET_2D6_Inh         | Yes                                               | Yes                                       |
| CYP_2D6_Substr      | Yes                                               | Yes                                       |
| CYP_2D6_Sites       | NonSubstrate                                      | C31(991); C30(991);<br>C19(744); C26(707) |
| MET_2D6_Km          | NonSubstrate                                      | 1.32E+01                                  |
| MET_2D6_Vmax        | NonSubstrate                                      | 8.37E+00                                  |
| MET_2D6_CLint       | NonSubstrate                                      | 5.07E+00                                  |
| CYP_2E1_Substr      | No                                                | No                                        |
| CYP_2E1_Sites       | NonSubstrate                                      | NonSubstrate                              |
| MET_3A4_Inh         | yes                                               | Yes                                       |
| CYP_3A4_Substr      | yes                                               | Yes                                       |
| CYP_3A4_Sites       | C33(768); C3(678); C20(551);<br>C1(545), C18(478) | C31(998); C30(998);<br>C26(897); C19(745) |
| MET_3A4_Km          | 51.402                                            | 5.74E+01                                  |
| MET_3A4_Vmax        | 6.456                                             | 1.80E+00                                  |
| MET_3A4_CLint       | 13.940                                            | 3.48E+00                                  |
| MET_3A4_HLM_Km      | 51.168                                            | 5.97E+01                                  |
| MET_3A4_HLM_Vmax    | 2.344                                             | 8.04E-01                                  |
| MET_3A4_HLM_CLint   | 45.813                                            | 1.35E+01                                  |
| MET_HLM_Total_CLint | 11.051                                            | 1.64E+01                                  |
| MET_3A4_I_mid       | Yes                                               | Yes                                       |
| MET_3A4_I_tes       | No                                                | No                                        |
| MET_3A4_Ki_mid      | 46.028                                            | 14.938                                    |
| MET_3A4_Ki_tes      | 9.465                                             | 61.559                                    |
| MET_UGT1A1          | No                                                | Yes                                       |
| MET_UGT1A3          | yes                                               | No                                        |
| MET_UGT1A4          | No                                                | No                                        |
| MET_UGT1A6          | No                                                | No                                        |
| MET_UGT1A8          | No                                                | Yes                                       |
| MET_UGT1A9          | No                                                | No                                        |
| MET_UGT1A10         | No                                                | Yes                                       |
| MET_UGT2B7          | yes                                               | No                                        |
| MET_UGT2B15         | No                                                | Yes                                       |
| CYP_Risk            | 0.00                                              | 0                                         |

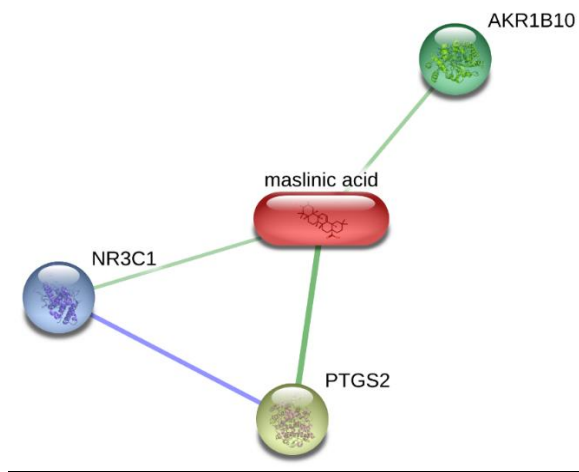

**Figure S1:** Representation of predicted molecular interaction network for maslinic acid and interacted target proteins.

|  |       |
|--|-------|
|  | P-902 |
|  | P-701 |

Cv7

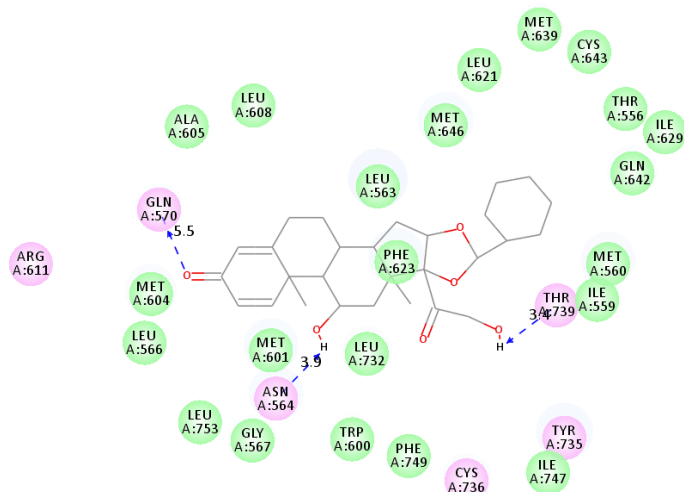

**Figure S2:** The 2D diagrams illustrating protein–ligand interactions of compound P-902, P-607 and CV7 (co-crystallized inhibitor of human anticancer target NR3C1; PDB: 1ZXN).
